# Supplementary material
Source: PubMed Central journal article supplement (PMC4409463)
Supplement: NIHMS652840-supplement-supplement_1.pdf [file NIHMS652840-supplement-supplement_1.pdf]

**Supplemental Information Table 1. Number of true positives, false positives, true negatives and false negatives by age group**

|                       | <b>Age Group</b> |              |              |              |            |
|-----------------------|------------------|--------------|--------------|--------------|------------|
|                       | <b>65-69</b>     | <b>70-74</b> | <b>75-79</b> | <b>80-84</b> | <b>85+</b> |
| <b>True Positive</b>  | 659              | 519          | 393          | 236          | 137        |
| <b>False Positive</b> | 8,639            | 5,683        | 3,901        | 2,303        | 1,035      |
| <b>False Negative</b> | 84               | 69           | 53           | 32           | 20         |
| <b>True Negative</b>  | 100,714          | 72,714       | 53,141       | 31,379       | 14,785     |
| <b>Total</b>          | 110,096          | 78,985       | 57,488       | 33,950       | 15,977     |
